# Supplementary material for: Circulating sterols as predictors of early allograft dysfunction and clinical outcome in patients undergoing liver transplantation
Source: PubMed Central journal article supplement (PMC5078158; doi:10.1007/s11306-016-1129-z), 2016-10-24
Supplement: 11306_2016_1129_MOESM3_ESM.pdf [file 11306_2016_1129_MOESM3_ESM.pdf]

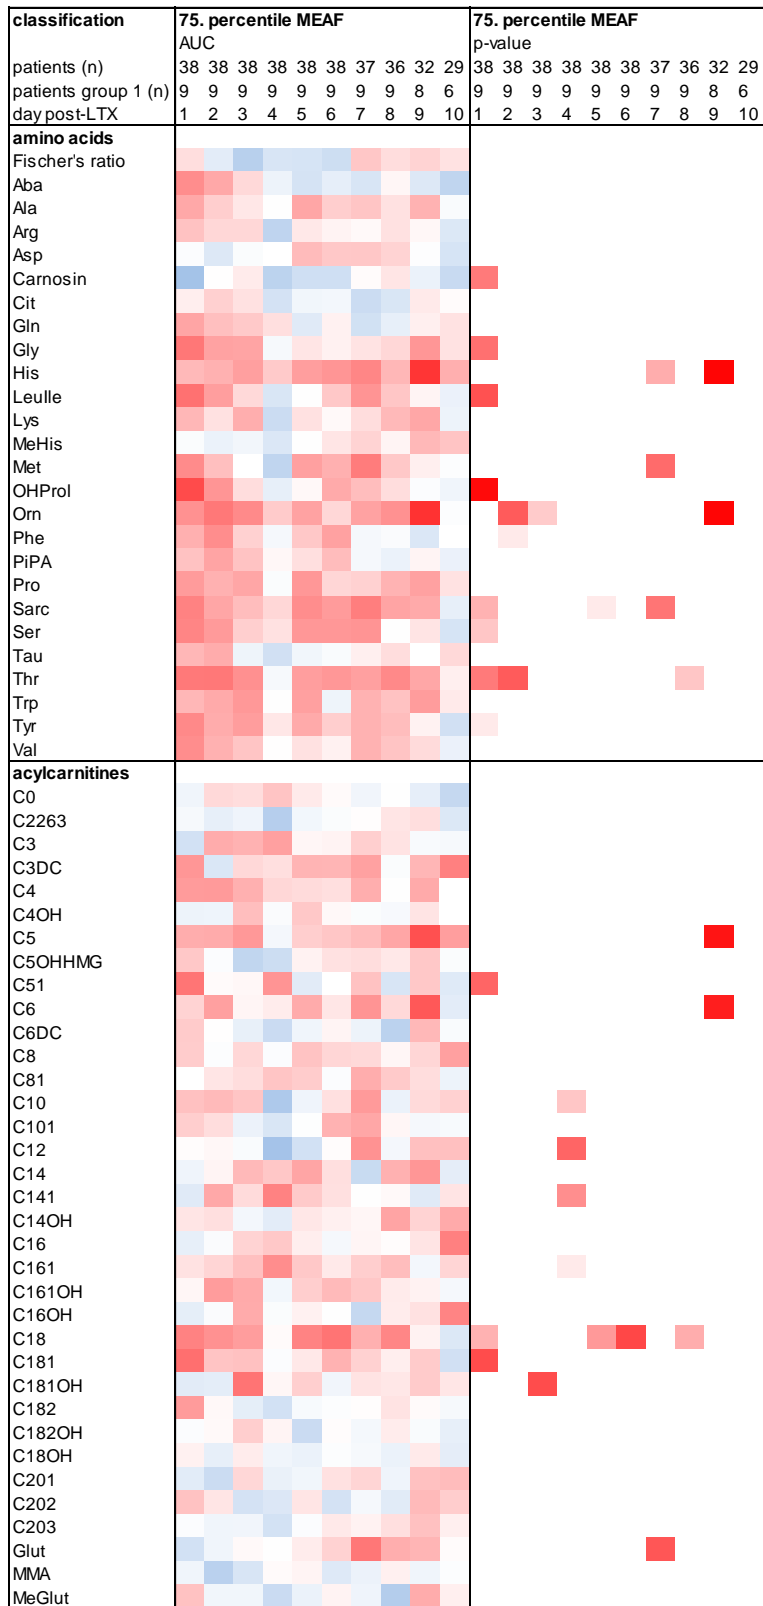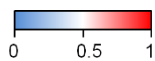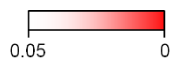

Figure S2
